# Supplementary material for: Deficient knowledge in adult Turner syndrome care as an incentive to found Turner centers in Germany
Source: PubMed Central journal article supplement (PMC6865863; doi:10.1530/ec-19-0418), 2019-10-18
Supplement: supplementary_figure_1.pdf [file supplementary_figure_1.pdf]

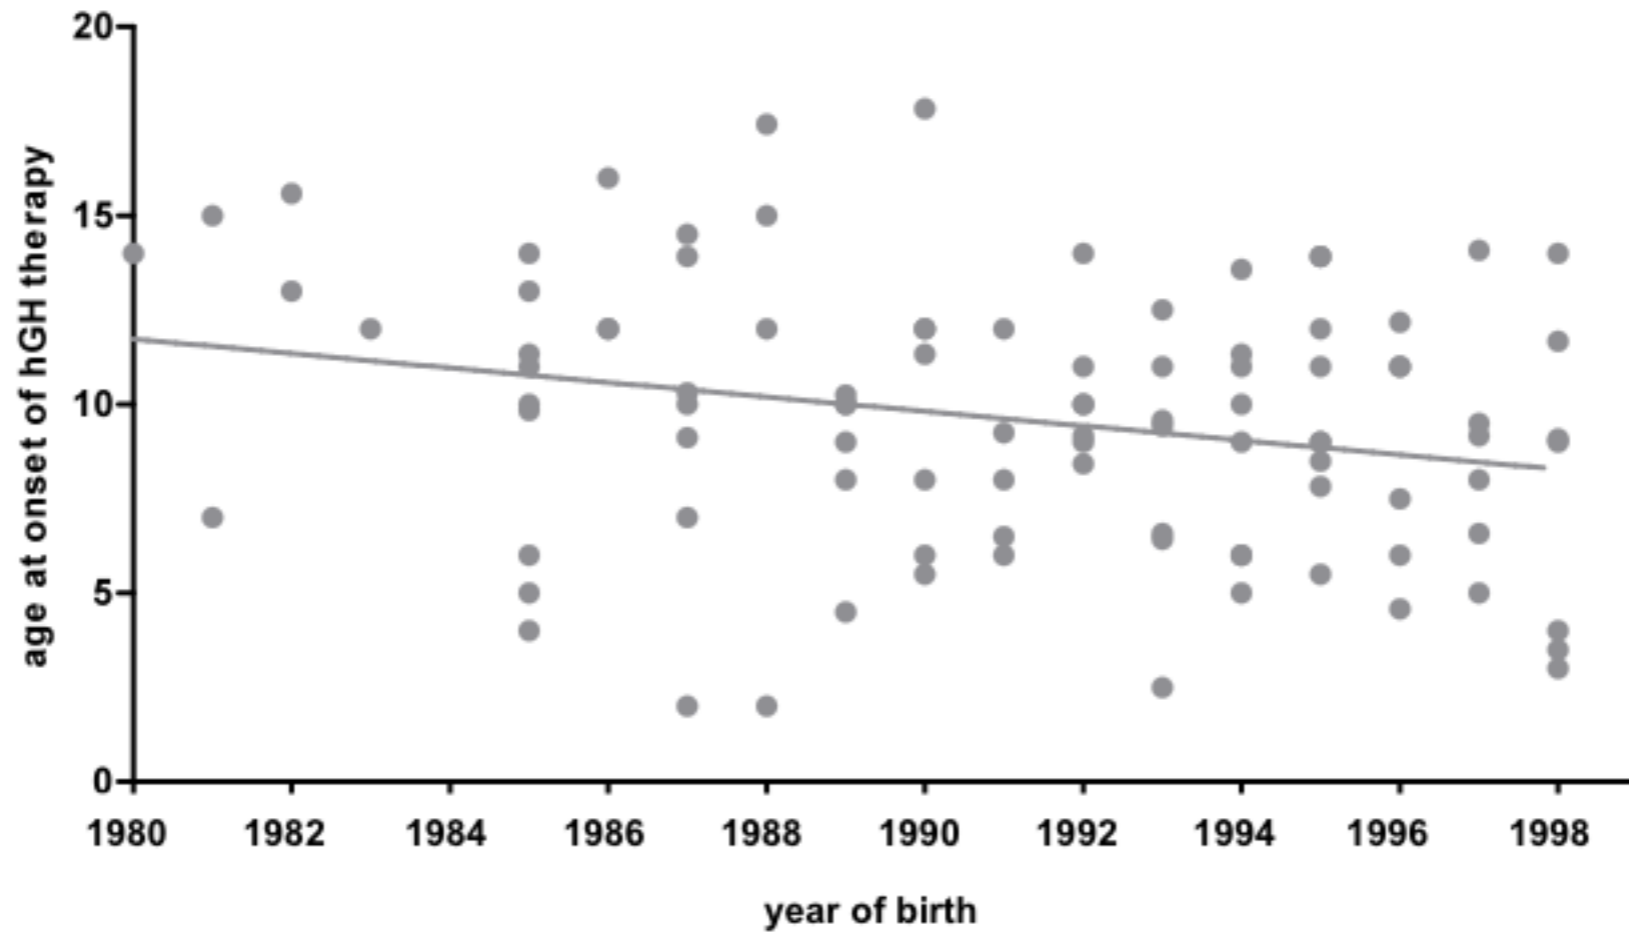

Supplementary Figure A: Effect of the year of birth (1980 to 1998) on the age at onset of hGH therapy (in years) N=97; The linear regression line is defined by  $y = -0.194x + 11.73$
